# Supplementary material for: Efficacy of probiotic Streptococcus thermophilus in counteracting TGF-β1-induced fibrotic response in normal human dermal fibroblasts
Source: PubMed Central journal article supplement (PMC9764521; doi:10.1186/s12950-022-00324-9), 2022-12-19
Supplement: 12950_2022_324_MOESM1_ESM.pdf [file 12950_2022_324_MOESM1_ESM.pdf]

# Supplementary materials

## Efficacy of probiotic *Streptococcus thermophilus* in counteracting TGF- $\beta$ 1-induced fibrotic response in normal human dermal fibroblasts

Francesca Lombardi, Francesca Rosaria Augello, Serena Artone, Blerina Bahiti, Jenna Marie Sheldon, Maurizio Giuliani, Maria Grazia Cifone, Paola Palumbo, Benedetta Cinque

**Fig. 2A**

$\alpha$ -SMA

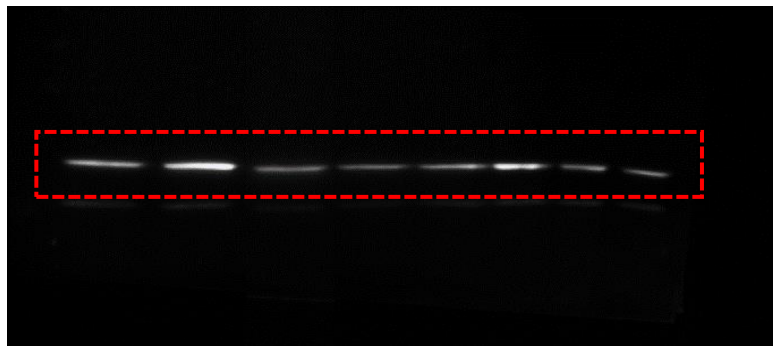

42 KDa

GAPDH

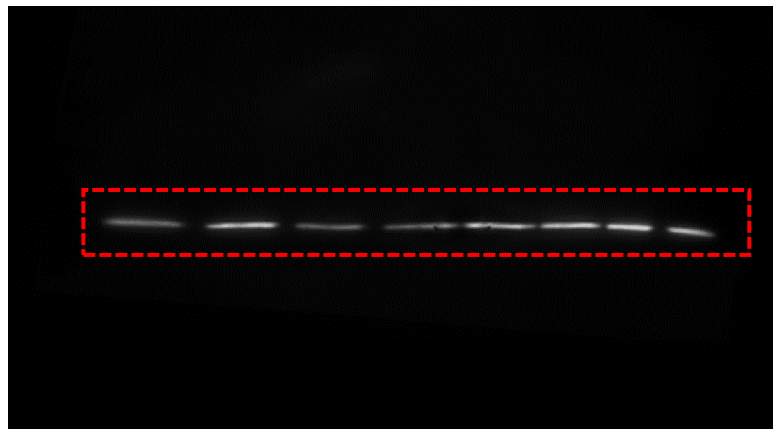

37 KDa

**Fig. 2C**

Fibronectin

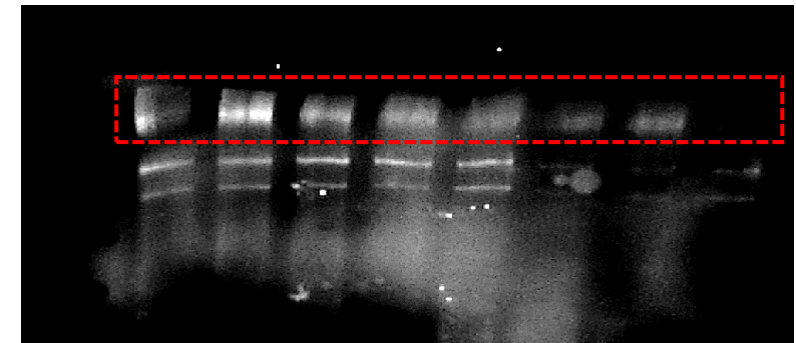

300 KDa

GAPDH

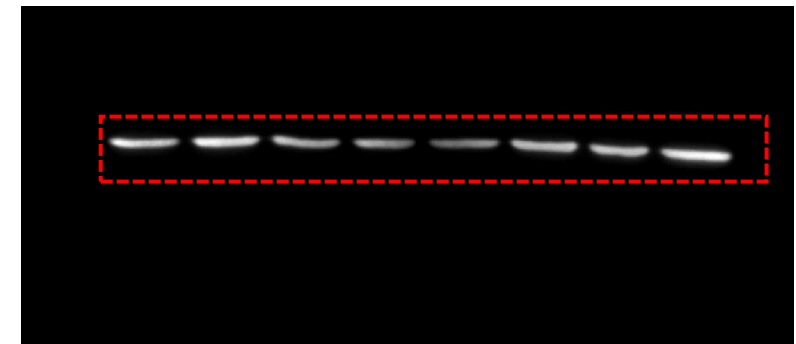

37 KDa

**Fig. 3**

**Collagen I**

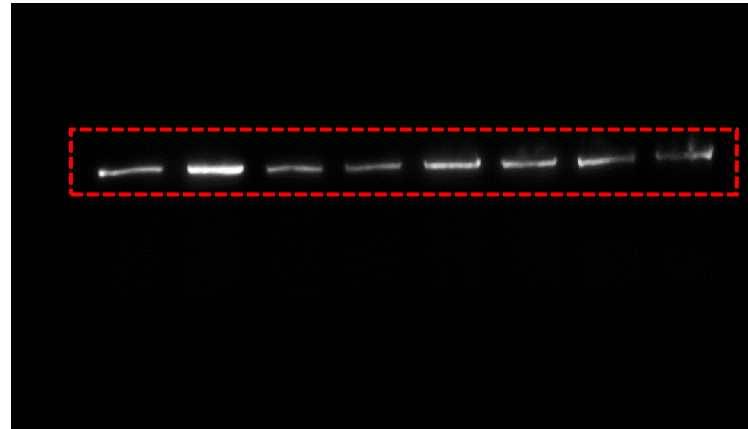

**130 KDa**

**GAPDH**

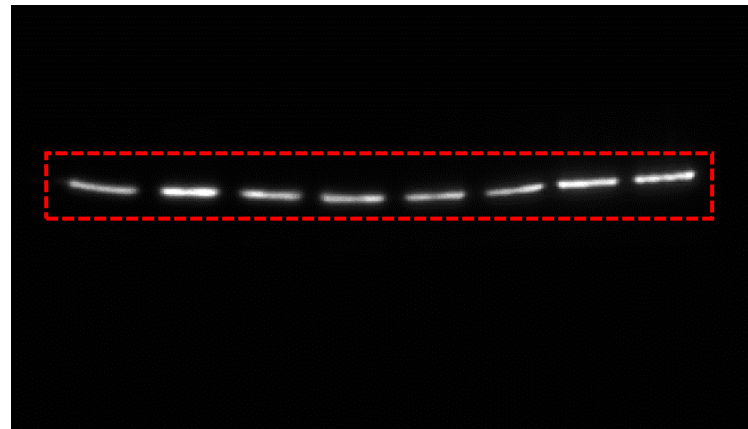

**37 KDa**



**Fig. 5A**

$\beta$ -Catenin

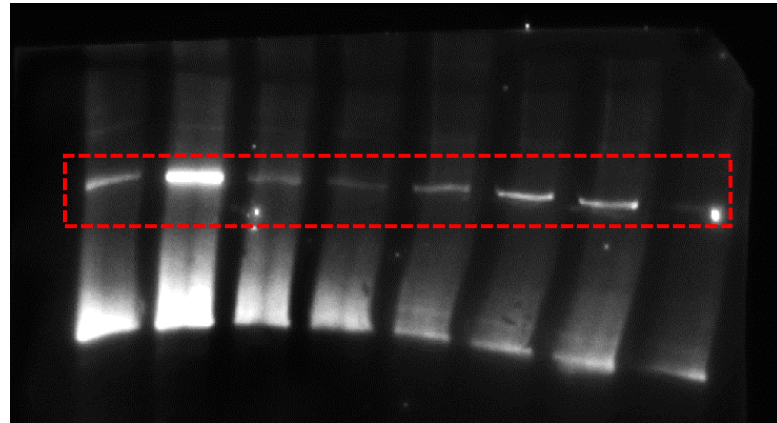

86 KDa

GAPDH

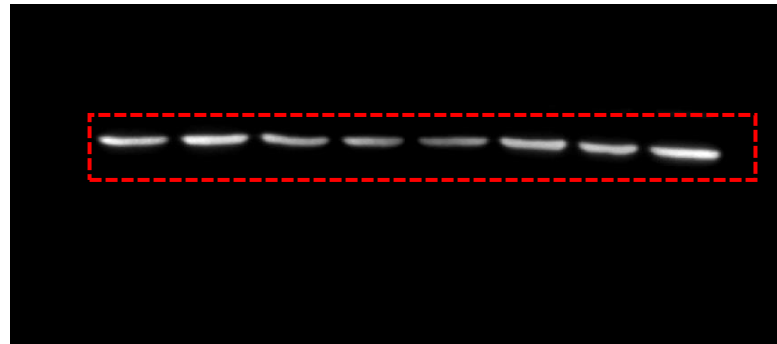

37 KDa

**Fig. 5B**

PPAR- $\gamma$

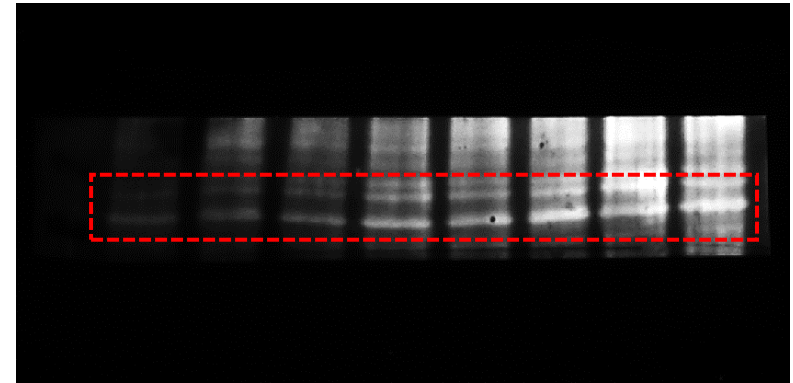

58 KDa

GAPDH

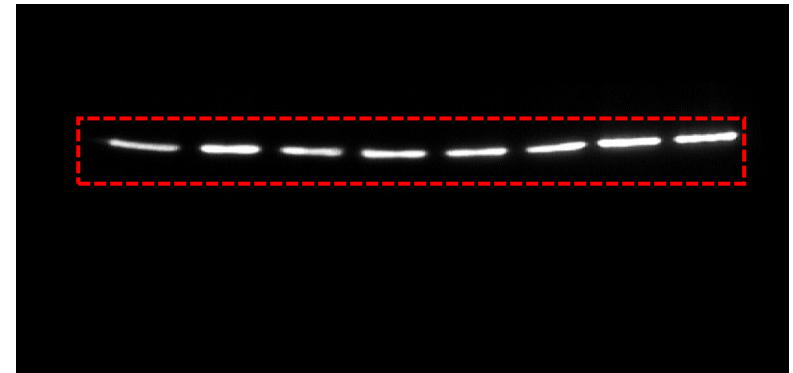

37 KDa
